# Supplementary material
Source: Springer Nature journal article supplement (https://www.springermedizin.de/resource/supplementary/12937_2010_322_MOESM2_ESM.pdf/25654864)

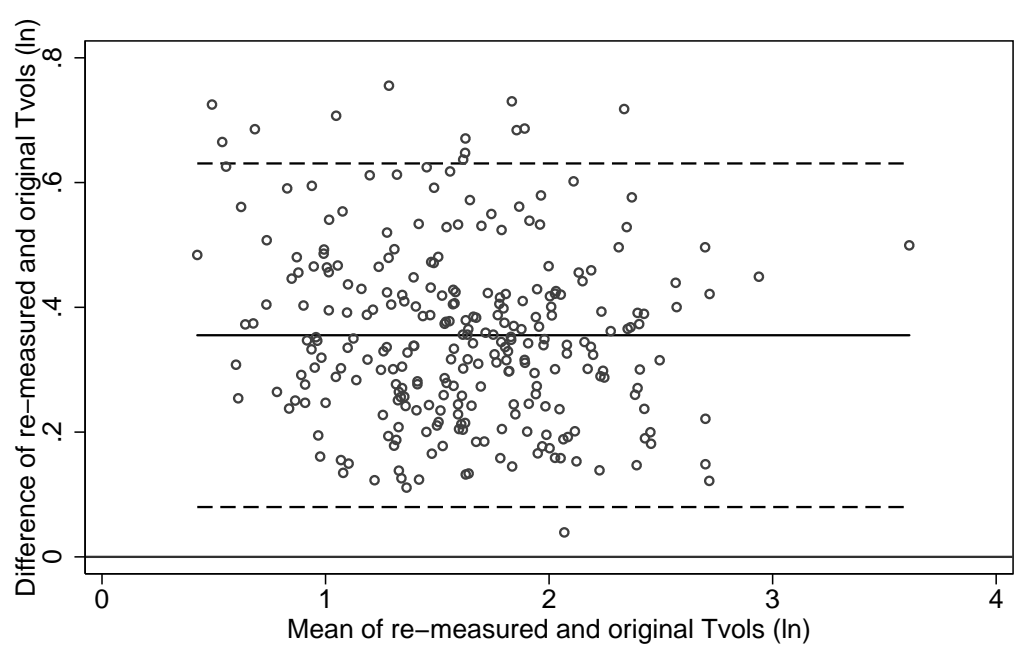

— observed average agreement    - - - - 95% limits of agreement

y=0 is line of perfect average agreement

Supplement: MOESM2 [file 25654864]
